# Supplementary material for: Metabolic profiling of ligands for the chemokine receptor CXCR3 by liquid chromatography-mass spectrometry coupled to bioaffinity assessment
Source: PubMed Central journal article supplement (PMC4551560; doi:10.1007/s00216-015-8867-z), 2015-07-12

**Analytical and Bioanalytical Chemistry**

**Electronic Supplementary Material**

**Metabolic profiling of ligands for the chemokine receptor CXCR3 by liquid chromatography-mass spectrometry coupled to bioaffinity assessment**

Marija Mladic, Danny J. Scholten, Maikel Wijtmans, David Falck, Rob Leurs, Wilfried M.A. Niessen, Martine J. Smit, Jeroen Kool

**Fig. S1** Outline of the experiment performed on each 96-well plate. (A) Nanofractions are collected onto a 96-well plate in serpentine fashion. (B) A serial dilution of a control compound ranging from 10 pM to 10  $\mu$ M is pipetted onto the 96-well plate in triplicate. The plate is subsequently freeze-dried and the radioligand binding assay is performed. The results of the radioligand binding assay are then plotted as a reconstructed bioaffinity chromatogram of a mixture analyzed (C) or a concentration-response curve of the control compound (D). The radioligand binding results from the maximum radioligand displacement ( $c^+$ ) and from no radioligand displacement ( $c^-$ ) are used to calculate the  $z'$  factor for each experiment

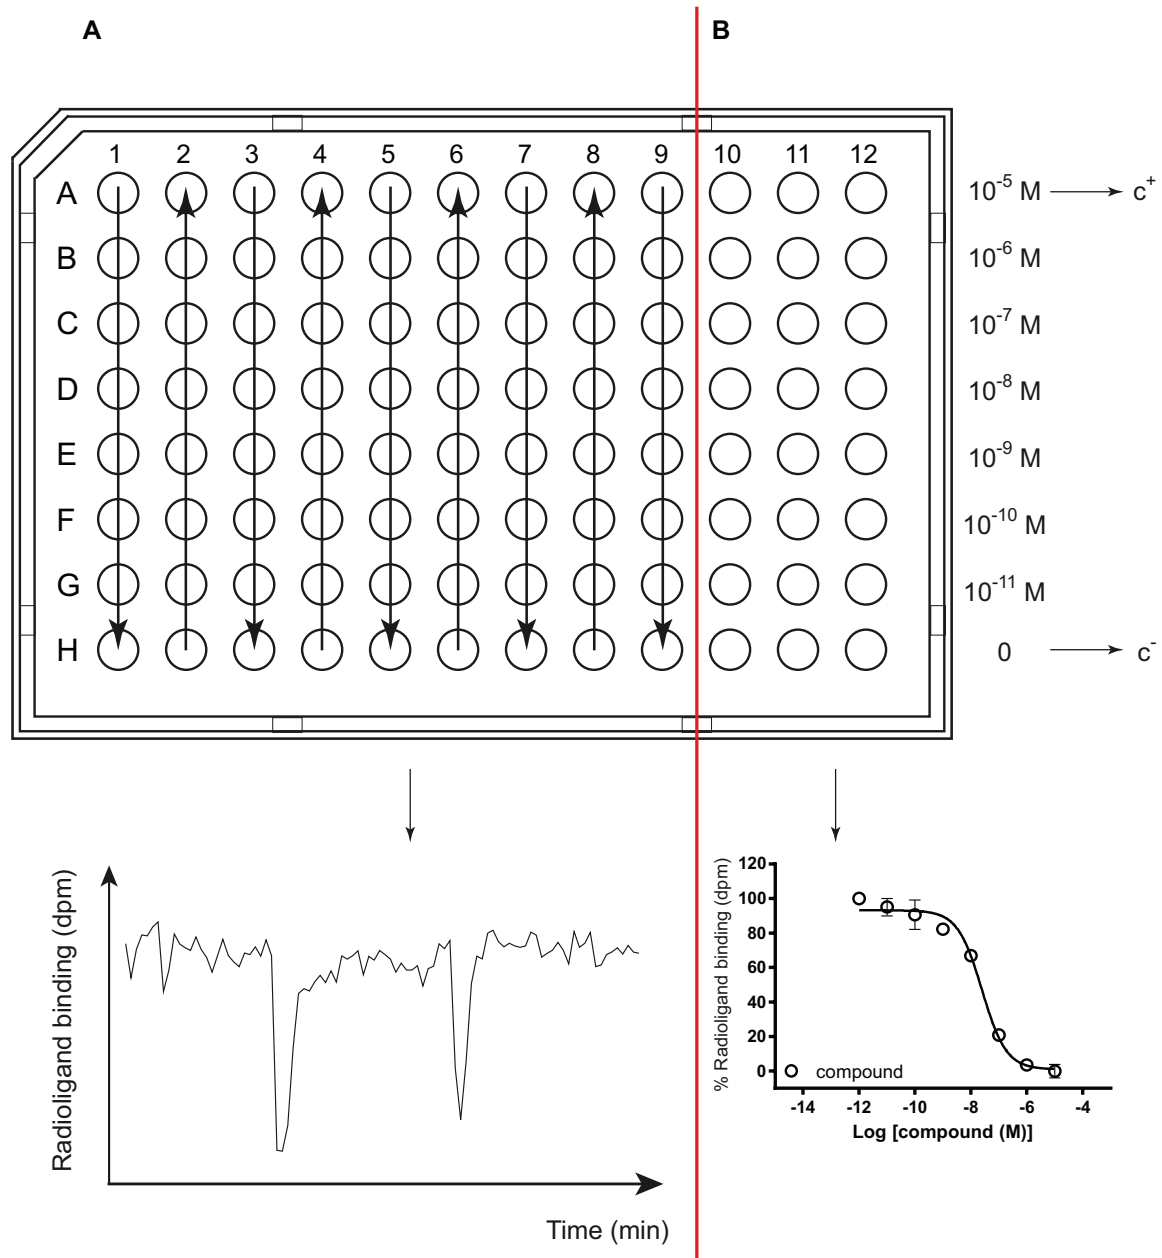

Supplement: 216_2015_8867_MOESM1_ESM.pdf [file 216_2015_8867_MOESM1_ESM.pdf]
